# Supplementary material
Source: publisher site journal article supplement (https://www.dovepress.com/article/204216)
Supplement: Supplementary file 1 [file get_supplementary_file.php]

Supplementary Materials

**Supplementary Table 1.** Dryness, erythema, rash and tactile roughness scoring scale

| **Grade** | **Dryness Scale** | **Tactile Roughness Scale** | **Redness/Erythema and Rash/Irritation Scale** |
| --- | --- | --- | --- |
| 0 | None (no evidence of scaling) | Smooth, no evidence of roughness | No evidence of irritation |
| 1 | Mild (slight flakiness, small size) | Slight roughness | Mild (minimal erythema, faint pink to definite pink, barely perceptible) |
| 2 | Moderate (small scales, easily visible flakiness) | Moderate roughness | Moderate (Definite erythema/redness, readily visible; minimal edema or minimal popular response) |
| 3 | Severe (large scales, cracking, fissuring and/or peeling) | Extreme roughness | Severe (Strong Erythema/very intense redness and papules) |
